# Supplementary material for: Human motor and economic decisions show common risk-seeking bias under asymmetric gains
Source: Research Square preprint supplement (doi:10.21203/rs.3.rs-7697126/v1), 2025-09-29
Supplement: Supplementary file 1 [file 0af17b9e3c3c1a4893d4d7d3.docx]

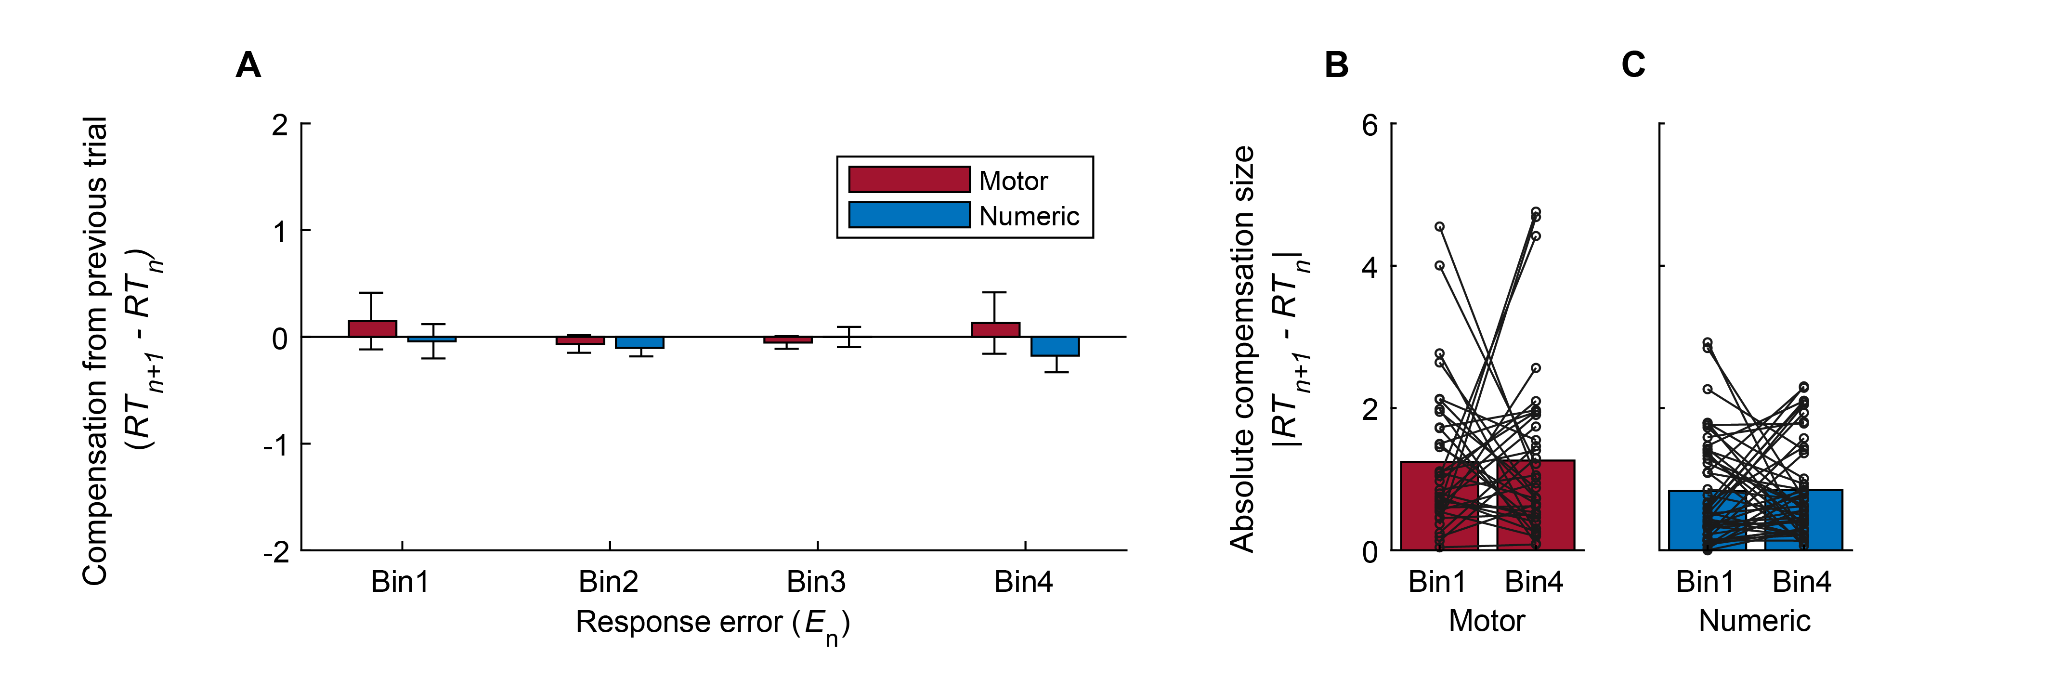
**Figure S1. Surrogate analysis of trial-by-trial compensation.**

The same analyses as in Figure 3 were performed using surrogate datasets, shuffled 10,000 times within each participant, to confirm that the observed difference between the motor and numeric tasks in trial-by-trial compensation was driven by sequential dynamics.

**(A)** The average compensation size plotted against the magnitude of the response error from the previous trial in the surrogate datasets (10,000 iterations per participant). A two-way repeated-measures ANOVA revealed no significant main effects or interaction (Bin: *F*(3, 331) = 0.24, *p* = 0.866, η² = 0.002; Task: *F*(1, 331) = 1.09, *p* = 0.297, η² = 0.003; Interaction: *F*(3, 331) = 0.48, *p* = 0.697, η² = 0.004).

**(B)** Individual surrogate data for the motor aiming task. The absolute value of the average compensation size in Bin 4 did not differ significantly from that in Bin 1 (*t*(35) = -0.1577, *p* = 0.876, η² = 7.10 × 10-4, paired *t*-test).

**(C)** The same surrogate analysis as in (B) was performed for the numeric aiming task. No significant difference was found between the absolute values of the average compensation size in Bin 1 and Bin 4 (*t*(47) = -0.1176, *p* = 0.907, η² = 2.94 × 10-4, paired *t*-test).
